# Supplementary material for: Co-based MOF heterogeneous catalyst for the efficient degradation of organic dye via peroxymonosulfate activation
Source: Royal Society of Chemistry journal article supplement (doi:10.1039/d3dt01783d), 2023-01-01
Supplement: d3dt01783d1.pdf [file d3dt01783d1.pdf]

## Supporting Information

### **Co-based MOF heterogeneous catalyst for efficient degradation of organic dye via peroxymonosulfate activation**

Wei Xie,<sup>a</sup> Yuan Yuan,<sup>a</sup> Jia-Jun Wang,<sup>a</sup> Shu-Ran Zhang,<sup>a</sup> Guang-Juan Xu,<sup>a</sup> Nan Jiang,<sup>a</sup>  
Yan-Hong Xu,<sup>\*a</sup> and Zhong-Min Su<sup>\*b</sup>

<sup>a</sup> *Key Laboratory of Preparation and Applications of Environmental Friendly Materials (Jilin Normal University), Ministry of Education, Changchun 130103, Jilin, PR China*

<sup>b</sup> *Institute of Functional Material Chemistry, Faculty of Chemistry, Northeast Normal University, Changchun 130024, Jilin (P. R. China)*

*\* Corresponding author*

*E-mail: xuyh198@163.com; zmsu@nenu.edu.cn*

## S1. Materials and characterization

All chemical reagents for synthesis were purchased commercially and were used directly without further purification. Powder X-ray diffraction (PXRD) data were obtained on a Rigaku model RINT Ultima III diffractometer by depositing powder on glass substrate, from  $2\theta = 3^\circ$  up to  $50^\circ$  with  $0.02^\circ$  increment. The IR spectrum was measured with a Perkin-elmer model FT-IR-frontier infrared spectrometer. Thermogravimetric analysis (TGA) was record on a Q5000IR analyser (TA Instruments) with an automated vertical overhead thermobalance heated from room temperature to  $800^\circ\text{C}$  with a heating rate of  $5^\circ\text{C}/\text{min}$  under nitrogen gas atmosphere. Elemental analyses (C, H and N) were conducted on a Perkin-Elmer 240C elemental analyzer. The UV-vis absorption spectra were carried out using Jasco V-770 spectrometer (JAPAN) spectrophotometer.

## S2. Synthesis of JLNU-500

$\text{Co}(\text{NO}_3)_2 \cdot 6\text{H}_2\text{O}$  (0.058 g, 0.2 mmol), 4-(pyridin-4-yl) benzoic acid (HPBA, 0.020 g, 0.1 mmol), and 5-aminoisophthalic acid ( $\text{H}_2\text{AIP}$ , 0.018 g, 0.1 mmol) were dissolved in a 6 mL mixture of N,N-dimethylacetamide (DMA) and  $\text{H}_2\text{O}$  (v/v = 1:1). The clear solution was sealed in a 10 mL Teflon-lined stainless vessel and heated at  $110^\circ\text{C}$  for 72 h. The vessel was then cooled slowly down to the room temperature. Purple block crystals of **JLNU-500** were separated in 83% yield based on HPBA ligand. Elemental microanalysis for  $\text{C}_{32}\text{H}_{41.5}\text{N}_5\text{O}_{10.75}\text{Co}_2$ , calculated (%): C, 48.90; H, 5.32; N, 8.91. Found (%): C, 48.67; H, 5.59; N, 8.52. IR data ( $\text{KBr cm}^{-1}$ ): 3616 (w), 3364 (m), 3269 (m), 2932 (m), 1631 (s), 1592 (s), 1572 (s), 1397 (s), 1265 (m), 1187 (m), 1098 (w), 1016 (m), 960 (m), 895 (w), 783 (s), 756 (m), 679 (w), 592 (w), 488 (w).

## S3. Heterogeneous RhB degradation by JLNU-500/PMS

In this study, a model pollutant RhB (rhodamine B) is chosen to evaluate the catalytic performance of Co-based MOF **JLNU-500** for PMS activation. The oxidation degradation experiments were proceeded in 100 mL of RhB aqueous solution (50 mg

L<sup>-1</sup>) in 250 mL reactor. NaOH (0.1 M) and HCl (0.1 M) were used to adjust the initial pH value. The experiments were carried out at 20 °C under ambient atmospheric condition. Before addition of PMS, the solution including **JLNU-500** catalyst (10 mg) and RhB contaminant was magnetically stirred for 10 min. And then we added PMS (30 mg, 1.0 mM) to the system. After desired intervals, 1.0 mL of the degraded solution was taken with adding 1.0 mL of 6 mM Na<sub>2</sub>S<sub>2</sub>O<sub>3</sub> aqueous solution to quench the reaction and filtered with a 0.22 -μm filter to separate the supernatant liquid from catalyst for analysis. The RhB concentrations were analyzed by using a UV-visible spectrophotometer at its maximum absorbance wavelength of 554 nm. The influence factors of RhB concentration, catalyst loading, PMS concentration, temperature and pH were carried out to assess the performance of RhB degradation. To test the recyclability of **JLNU-500** catalyst, after degradation each experiment, the **JLNU-500** was collected by centrifugation, washed with water and ethanol and dried at 70 °C for 24 h. Then the same catalyst was used for the next run catalytic degradation experiment.

A general pseudo-first-order reaction was used to estimate the degradation reaction rate as shown below:

$$\ln(C/C_0) = -kt$$

where C<sub>0</sub> and C are the initial concentration and the concentration at various time, respectively, *k* is the first order reaction kinetic constant of RhB removal (min<sup>-1</sup>).

#### **LC-MS method**

The reaction intermediates of RhB were identified using liquid chromatography-mass spectrometry (LC-MS) at 554 nm. Water (mobile phase A with a flow rate of 0.25 mL min<sup>-1</sup>) and methanol (mobile phase B with a flow rate of 0.75 mL min<sup>-1</sup>) were used as mobile phases. A fixed volume injection loop was used to inject 10 μl of sample.

#### **S4. Single-crystal X-ray diffraction**

The X-ray single crystal diffraction data of **JLNU-500** was collected at 296 K on a Bruker APEXII CCD diffractometer with graphite-monochromated Mo Kα radiation

( $\lambda = 0.71069 \text{ \AA}$ ). Absorption corrections were applied using multi-scan technique. The structure was solved by Direct Method and refined by full-matrix least-squares techniques using the SHELXL-2018 program<sup>1</sup> within WINGX software<sup>2</sup>. Non-hydrogen atoms were refined with anisotropic temperature parameters. All the solvent molecules which are highly disordered and not able to be modeled were treated by the SQUEEZE<sup>3</sup> routine in PLATON<sup>4</sup>. The detailed crystallographic data and structure refinement parameters for **JLNU-500** (CCDC: 2250236) are summarized in Table S1.

**Table S1** Crystal data and structure refinements for **JLNU-500**.

| Identification code                    | <b>JLNU-500</b>                                                     |
|----------------------------------------|---------------------------------------------------------------------|
| formula                                | $\text{C}_{32}\text{H}_{41.5}\text{Co}_2\text{N}_5\text{O}_{10.75}$ |
| Formula weight                         | 786.06                                                              |
| Crystal system                         | Monoclinic                                                          |
| Space group                            | $P2_1/n$                                                            |
| $a \text{ (\AA)}$                      | 15.649 (7)                                                          |
| $b \text{ (\AA)}$                      | 12.876 (6)                                                          |
| $c \text{ (\AA)}$                      | 17.677 (8)                                                          |
| $\alpha \text{ (}^\circ\text{)}$       | 90.000                                                              |
| $\beta \text{ (}^\circ\text{)}$        | 107.059 (8)                                                         |
| $\gamma \text{ (}^\circ\text{)}$       | 90.000                                                              |
| $V \text{ (\AA}^3\text{)}$             | 3405 (3)                                                            |
| $Z$                                    | 4                                                                   |
| $D_{\text{calcd.}} [\text{g cm}^{-3}]$ | 1.533                                                               |
| $F(000)$                               | 1634                                                                |
| Reflections collected / unique         | 15277 / 5940                                                        |
| $R(\text{int})$                        | 0.0650                                                              |
| Goodness-of-fit on $F^2$               | 1.086                                                               |
| $R_1^a [I > 2\sigma(I)]$               | 0.0677                                                              |
| $wR_2^b (\text{all data})$             | 0.1872                                                              |

$$^a R_1 = \sum ||F_o| - |F_c|| / \sum |F_o|, ^b wR_2 = [\sum w(|F_o|^2 - |F_c|^2)^2 / \sum w(F_o^2)^2]^{1/2}.$$

**Table S2** Selected bond lengths ( $\text{\AA}$ ) for **JLNU-500**.

| Atom | Atom | Length/Å | Atom | Atom | Length/Å |
|------|------|----------|------|------|----------|
| Co1  | O1#1 | 2.120(3) | Co2  | O2#1 | 2.033(4) |
| Co1  | O4#2 | 2.067(3) | Co2  | O3   | 1.980(4) |
| Co1  | O6   | 2.188(4) | Co2  | O5   | 2.003(4) |
| Co1  | O7   | 2.046(3) | Co2  | O7   | 2.012(4) |
| Co1  | N1#3 | 2.209(5) | Co2  | O7#2 | 2.146(3) |
| Co1  | N2#4 | 2.208(4) |      |      |          |

#1 1/2-X, -1/2+Y, 1/2-Z; #2 1-X, 1-Y, 1-Z; #3 -1/2+X, 1/2-Y, 1/2+Z; #4 1/2+X, 1/2-Y, 1/2+Z.

**Table S3** Selected bond angles (°) for **JLNU-500**.

| Atom | Atom | Atom | Angle/°    | Atom | Atom | Atom | Angle/°    |
|------|------|------|------------|------|------|------|------------|
| O1#1 | Co1  | O6   | 92.61(16)  | O7   | Co1  | N2#3 | 168.78(16) |
| O1#1 | Co1  | N1#2 | 87.72(17)  | N2#3 | Co1  | N1#2 | 101.12(18) |
| O1#1 | Co1  | N2#3 | 82.52(15)  | O2#1 | Co2  | O7#4 | 174.52(17) |
| O4#4 | Co1  | O1#1 | 167.01(13) | O3   | Co2  | O2#1 | 86.23(15)  |
| O4#4 | Co1  | O6   | 89.90(16)  | O3   | Co2  | O5   | 107.0(2)   |
| O4#4 | Co1  | N1#2 | 89.14(18)  | O3   | Co2  | O7#4 | 92.38(14)  |
| O4#4 | Co1  | N2#3 | 85.73(15)  | O3   | Co2  | O7   | 141.02(18) |
| O6   | Co1  | N1#2 | 177.10(17) | O5   | Co2  | O2#1 | 99.87(18)  |
| O6   | Co1  | N2#3 | 76.07(16)  | O5   | Co2  | O7#4 | 85.60(15)  |
| O7   | Co1  | O1#1 | 93.12(14)  | O5   | Co2  | O7   | 110.89(16) |
| O7   | Co1  | O4#4 | 99.42(14)  | O7   | Co2  | O2#1 | 96.09(15)  |
| O7   | Co1  | O6   | 93.89(15)  | O7   | Co2  | O7#4 | 81.67(14)  |
| O7   | Co1  | N1#2 | 88.97(17)  |      |      |      |            |

#1 1/2-X, -1/2+Y, 1/2-Z; #2 -1/2+X, 1/2-Y, 1/2+Z; #3 1/2+X, 1/2-Y, 1/2+Z; #4 1-X, 1-Y, 1-Z.

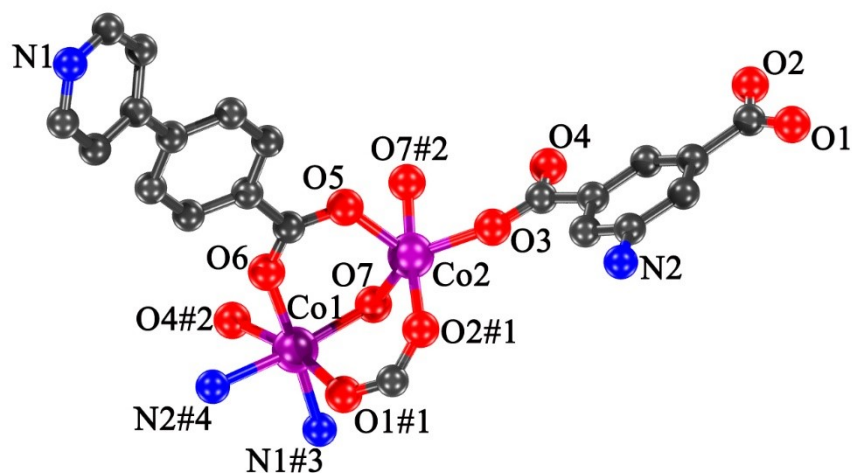

**Fig. S1** The coordination environment diagram in **JLNU-500**, symmetry codes: #1  $1/2-X, -1/2+Y, 1/2-Z$ ; #2  $1-X, 1-Y, 1-Z$ ; #3  $-1/2+X, 1/2-Y, 1/2+Z$ ; #4  $1/2+X, 1/2-Y, 1/2+Z$ . All hydrogen atoms have been omitted for clarity. Violet = Co; dark gray = C; red = O; blue = N.

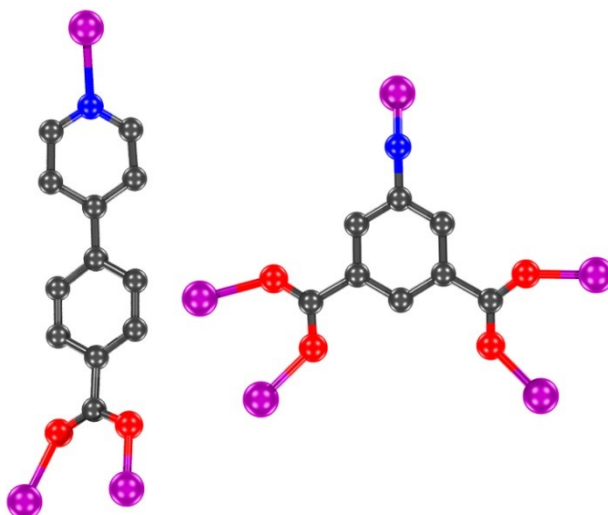

**Fig. S2** The coordination modes of ligands in **JLNU-500**.

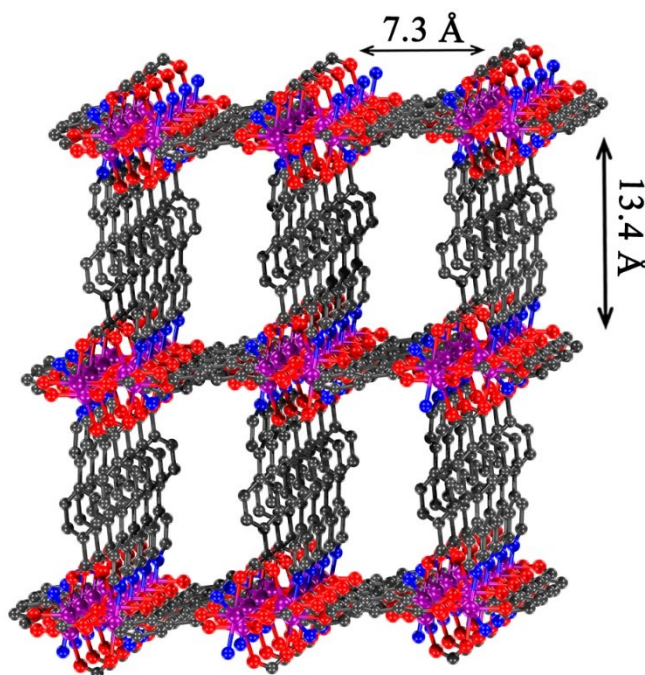

**Fig. S3** Ball-and-stick representation of the 3D network of **JLNU-500** viewed from  $b$  axis and the channel ( $13.4 \text{ \AA} \times 7.3 \text{ \AA}$ ).

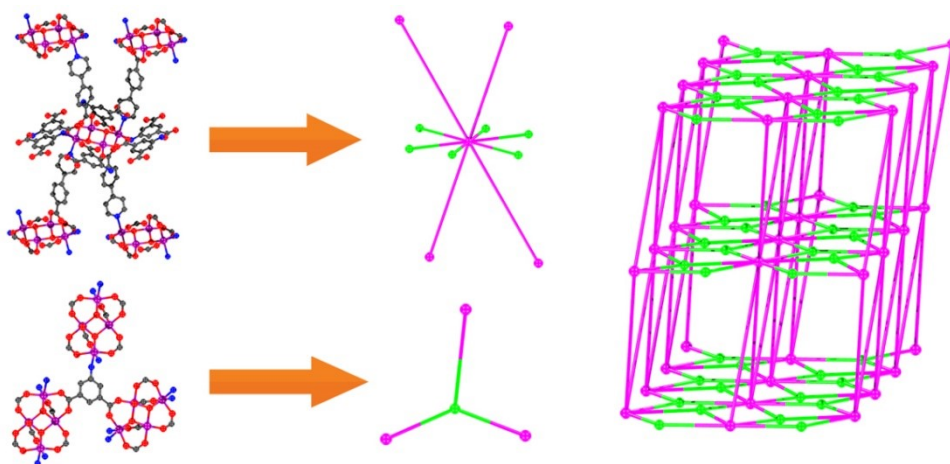

**Fig. S4** The (3,10)-connected topology network in **JLNU-500**.

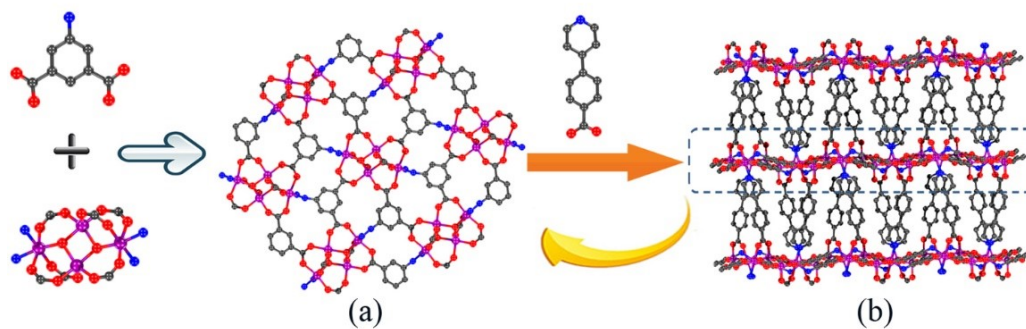

**Fig. S5** (a) The layer is formed by Co<sub>4</sub>O<sub>2</sub> clusters and AIP<sup>2-</sup> ligands, (b) ball-and-stick representations of the 3D pillared-layer structure of **JLNU-500**.

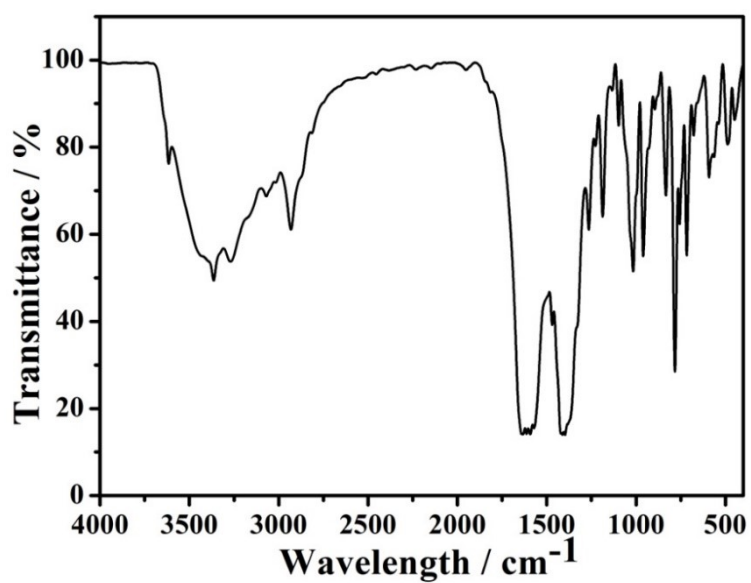

**Fig. S6** The FT-IR curve of as-synthesized **JLNU-500** at room temperature.

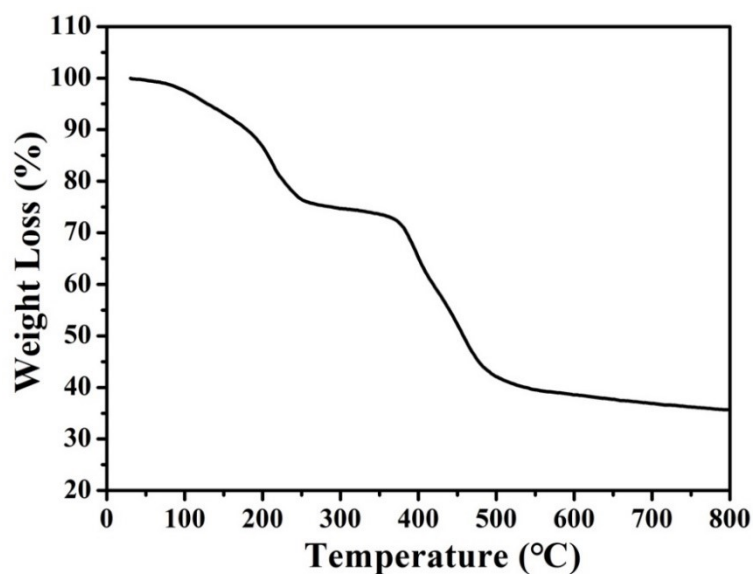

**Fig. S7** TGA curve of as-synthesized **JLNU-500** under nitrogen gas atmosphere.

**Table S4** Comparison of different Co-containing catalysts towards pollutants for PMS activation.

| Catalyst                                                | pollutant         | PMS dose      | Catalyst dose (g/L) | Degradation efficiency (>95%) | Ref.      |
|---------------------------------------------------------|-------------------|---------------|---------------------|-------------------------------|-----------|
| HCo <sub>3</sub> O <sub>4</sub> /C                      | BPA, 87.6 $\mu$ m | 325.3 $\mu$ M | 0.1                 | 97%, 4 min                    | 5         |
| Co <sub>3</sub> O <sub>4</sub> /N/C                     | Aniline, 20 ppm   | 0.15 g/L      | 0.01                | 99.4%, 10 min                 | 6         |
| Fe <sub>3</sub> Co <sub>7</sub> @C-650                  | BPA, 20 mg/L      | 0.2 g/L       | 0.1                 | 98%, 30 min                   | 7         |
| CoMn <sub>2</sub> O <sub>4</sub>                        | SA, 10 mg/L       | 0.1 g/L       | 0.05                | 100%, 30 min                  | 8         |
| Co <sub>3</sub> O <sub>4</sub> -palygorskite composites | SMX, 30 $\mu$ M   | 0.3 mM        | 0.125               | 100%, 3.5 min                 | 9         |
| ZIF-67/PAN                                              | AY, 500 mg/L      | 0.5 g/L       | 0.233               | 95.1%, 10 min                 | 10        |
| Co <sub>3</sub> O <sub>4</sub> -MC                      | OTC, 40 $\mu$ M   | 0.5 mM        | 0.2                 | 100%, 12 min                  | 11        |
| NiCo-LDH/10                                             | RR-120, 0.1 mM    | 3 mM          | 0.005               | 89%, 10 min                   | 12        |
| CuCo-MOF-74                                             | MB, 0.2 mM        | 2.0 mM        | 0.05                | 100%, 30 min                  | 13        |
| Co-BTC                                                  | DBP, 0.018 mM     | 1.62 mM       | 0.3                 | 90%, 5 min                    | 14        |
| Co-MOF                                                  | MO, 20 mg/L       | 1.0 mM        | 0.1                 | 98.56%, 4.5 min               | 15        |
| <b>JLNU-500</b>                                         | RhB, 50 mg/L      | 1.0 mM        | 0.1                 | 100%, 6 min                   | this work |

BPA, bisphenol A, SA, sulfanilamide, SMX, sulfamethoxazole, AY, acid yellow, OTC, oxytetracycline, RR-120, Reactive Red-120, MB, methylene blue, DBP, dibutyl phthalate, MO, methyl orange.

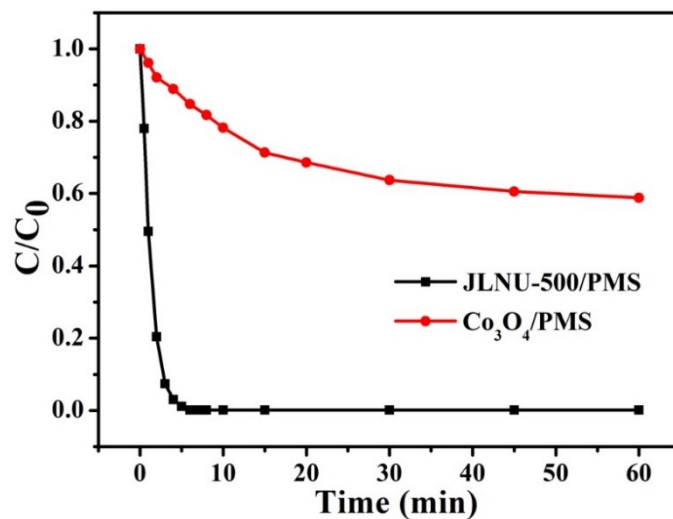

**Fig. S8** RhB degradation using **JLNU-500** and  $\text{Co}_3\text{O}_4$  under the same experimental conditions  $[\text{RhB}] = 50 \text{ mg/L}$ ,  $[\text{PMS}] = 1.0 \text{ mM}$ ,  $[\text{JLNU-500}] = 10 \text{ mg}$  or  $[\text{Co}_3\text{O}_4] = 10 \text{ mg}$ ,  $T = 20 \text{ }^\circ\text{C}$ , initial  $\text{pH} = 7.0$ .

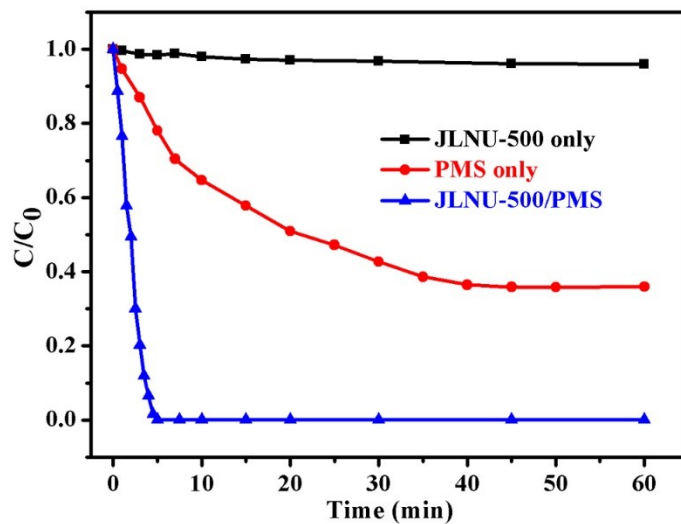

**Fig. S9** MO degradation under different reaction conditions  $[\text{MO}] = 50 \text{ mg/L}$ ,  $[\text{PMS}] = 1.0 \text{ mM}$ ,  $[\text{JLNU-500}] = 10 \text{ mg}$ ,  $T = 20 \text{ }^\circ\text{C}$ , initial  $\text{pH} = 7.0$ .

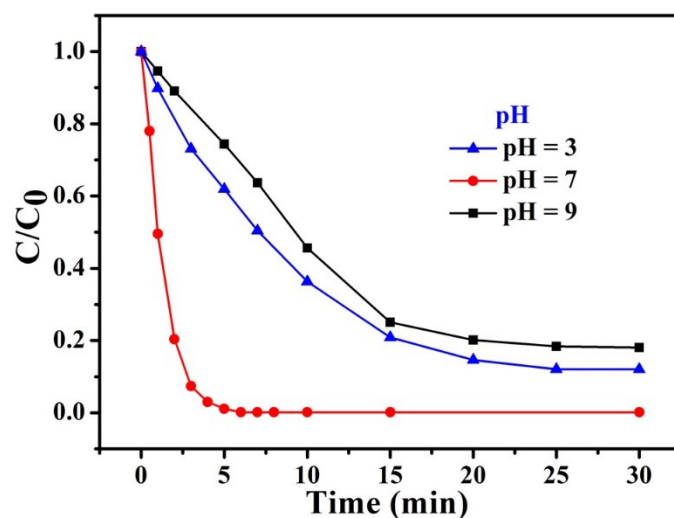

**Fig. S10** Effect of pH on the degradation removal of RhB using **JLNU-500**/PMS. [RhB] = 50 mg/L, [PMS] = 1.0 mM; [catalyst **JLNU-500**] = 10 mg; T = 20 °C.

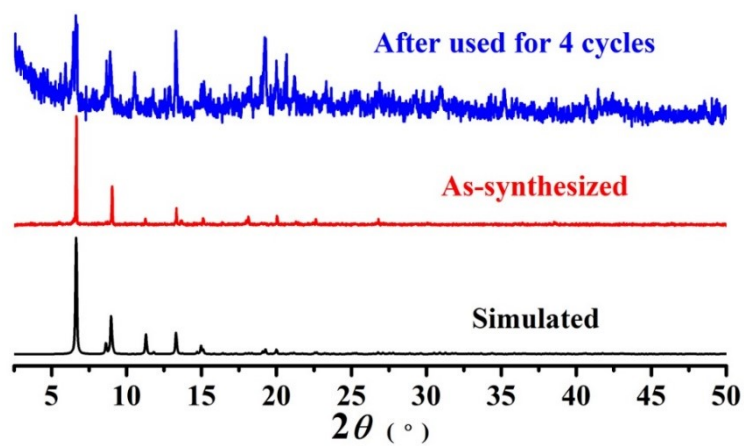

**Fig. S11** The PXRD pattern of catalyst **JLNU-500** after being used for 4 cycles.

20230903-xw1a #108-120 RT: 1.15-1.28 AV: 13 SB: 13 0.03-0.16 NL: 4.74E7  
T: + c ESI Q1MS [50.000-800.000]

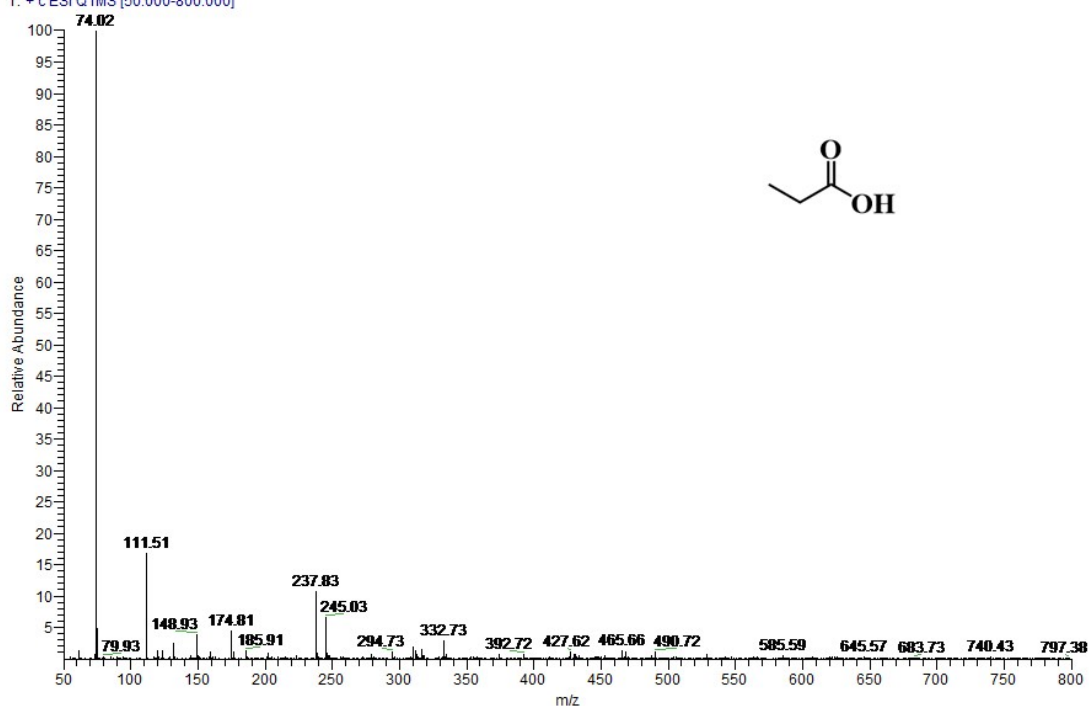

Fig. S12 Mass spectra of 74 in RhB degradation products.

20230903-xw1a #186-208 RT: 1.99-2.22 AV: 23 SB: 13 0.03-0.16 NL: 3.23E8  
T: + c ESI Q1MS [50.000-800.000]

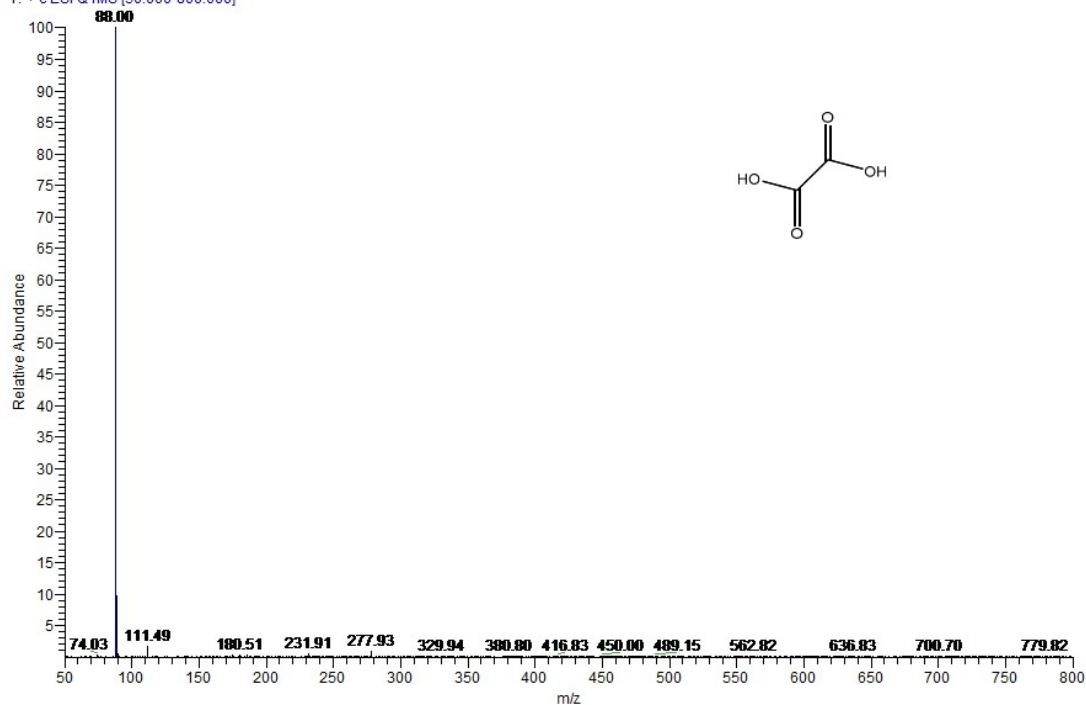

Fig. S13 Mass spectra of 90 in RhB degradation products.

20230903-xw1a#125-153 RT: 1.33-1.63 AV: 29 SB: 13 0.03-0.16 NL: 3.61E7  
T: + c ESI Q1MS [50.000-800.000]

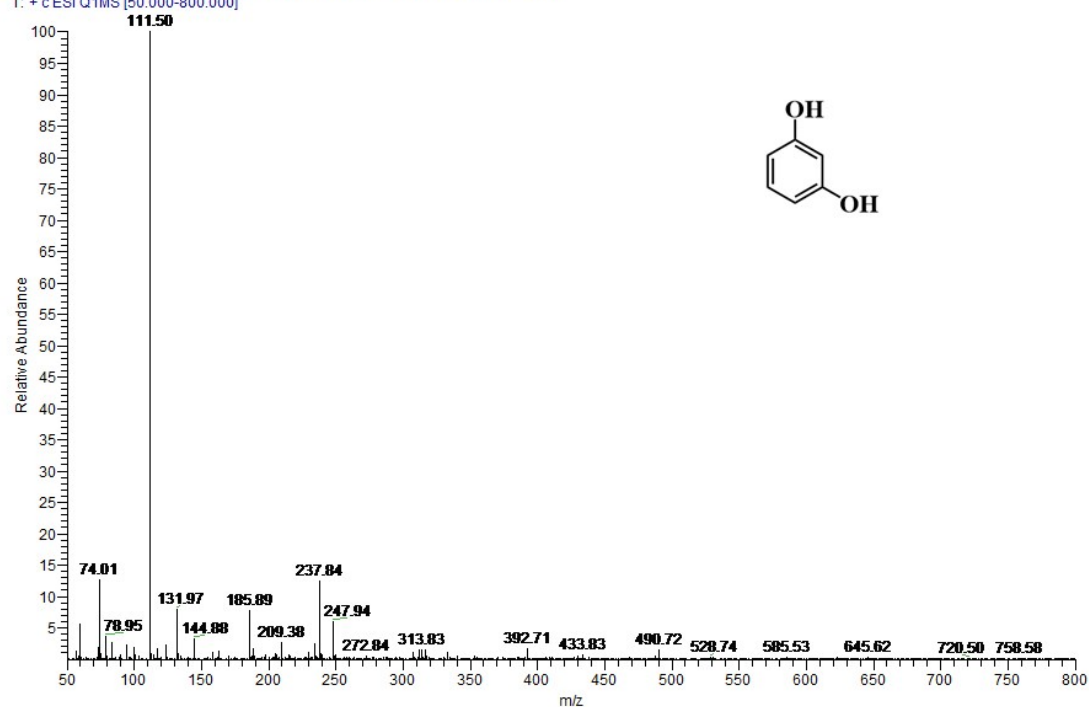

Fig. S14 Mass spectra of 110 in RhB degradation products.

20230903-xw1a#1234-1262 RT: 13.20-13.50 AV: 29 SB: 38 7.65-8.04 NL: 1.28E7  
T: + c ESI Q1MS [50.000-800.000]

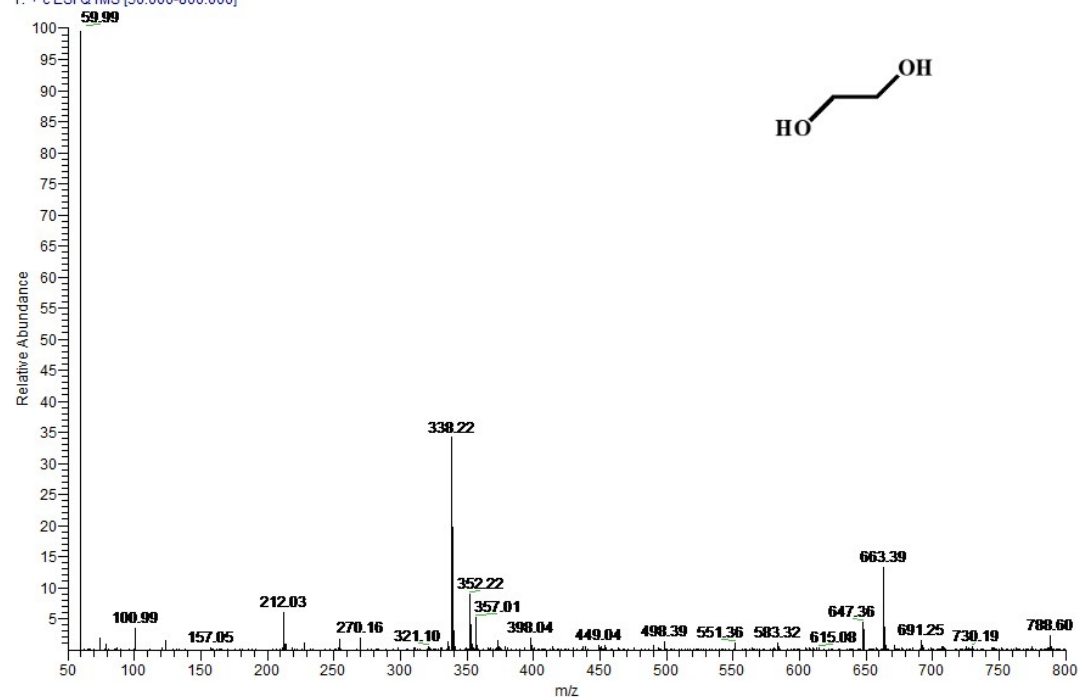

Fig. S15 Mass spectra of 60 in RhB degradation products.

20230903-xw1a #1033-1064 RT: 11.05-11.38 AV: 32 SB: 38 7.65-8.04 NL: 4.13E6  
T: + c ESI Q1MS [50.000-800.000]

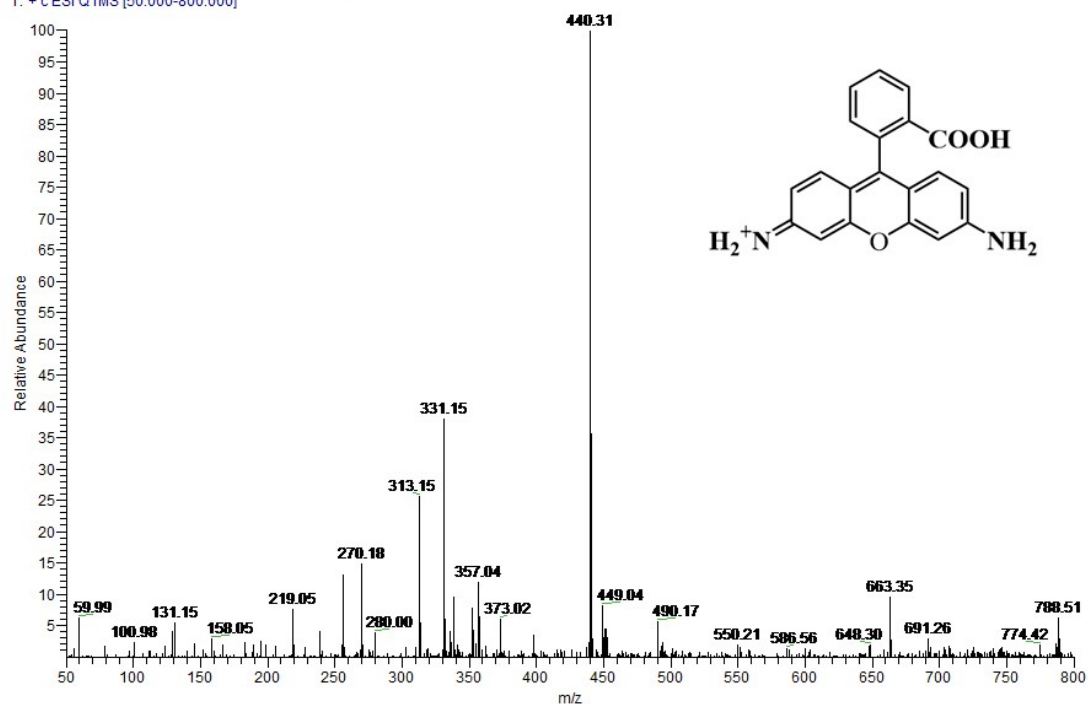

**Fig. S16** Mass spectra of 331 in RhB degradation products.

20230903-xw1a #261-285 RT: 2.79-3.05 AV: 25 SB: 13 0.03-0.16 NL: 8.25E7  
T: + c ESI Q1MS [50.000-800.000]

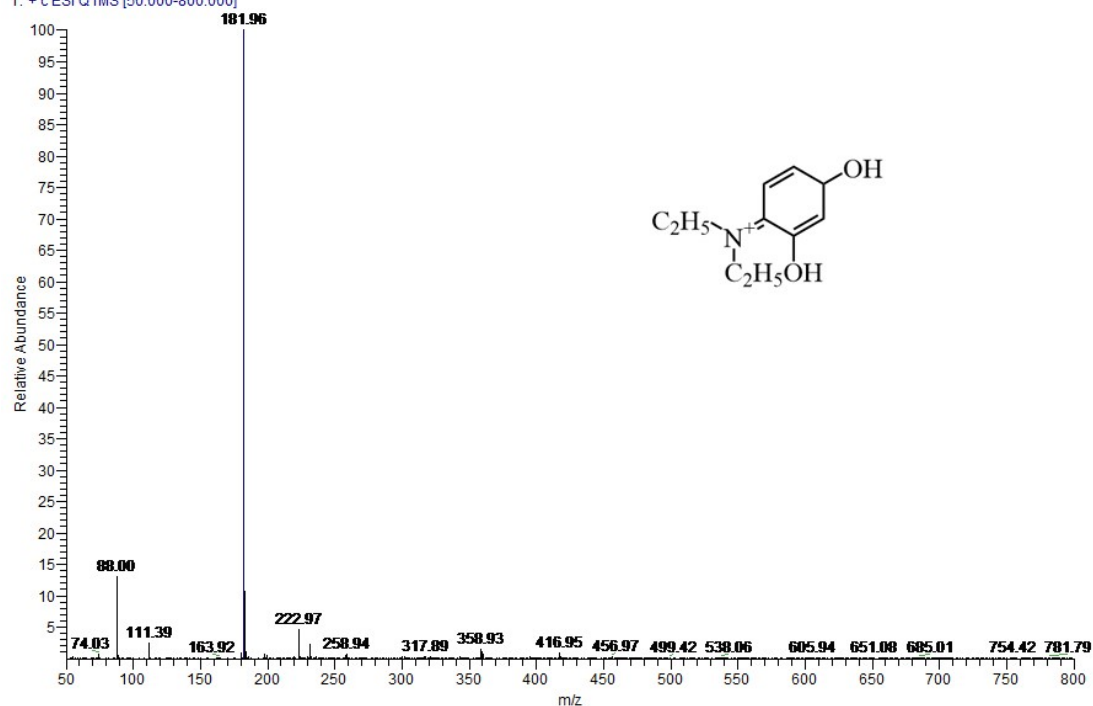

**Fig. S17** Mass spectra of 182 in RhB degradation products.

20230903-xw1a #765-790 RT: 8.18-8.45 AV: 26 SB: 38 7.65-8.04 NL: 8.37E6  
T: + c ESI Q1MS [50.000-800.000]

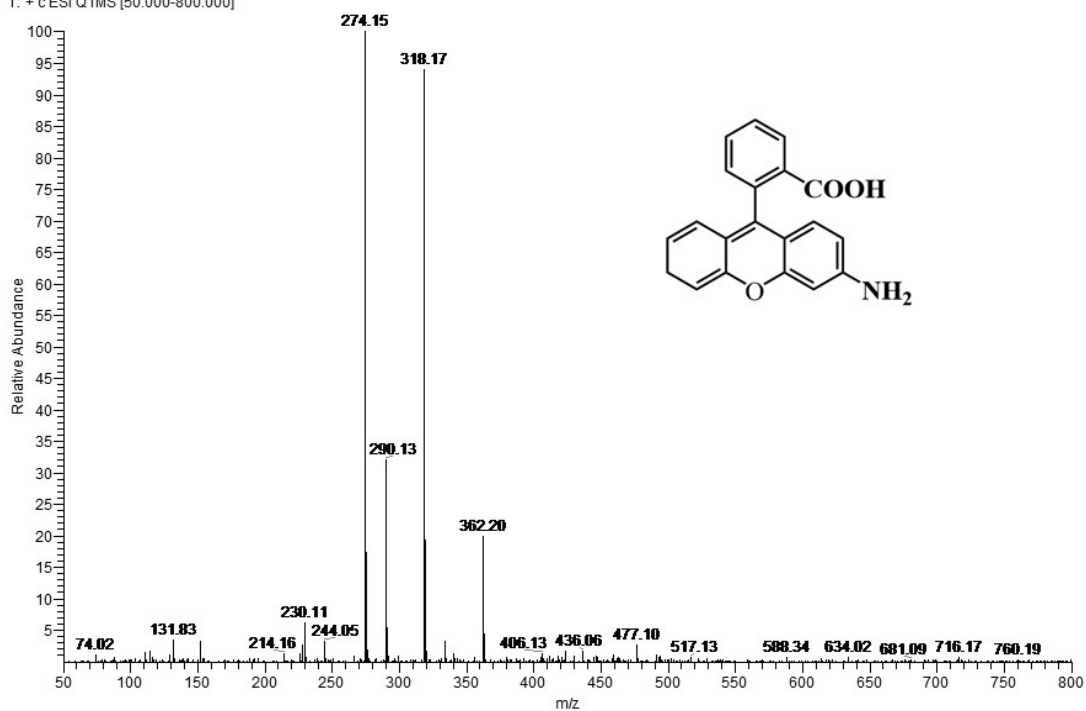

**Fig. S18** Mass spectra of 318 in RhB degradation products.

20230903-xw1a #983-994 RT: 10.52-10.63 AV: 12 SB: 38 7.65-8.04 NL: 1.15E7  
T: + c ESI Q1MS [50.000-800.000]

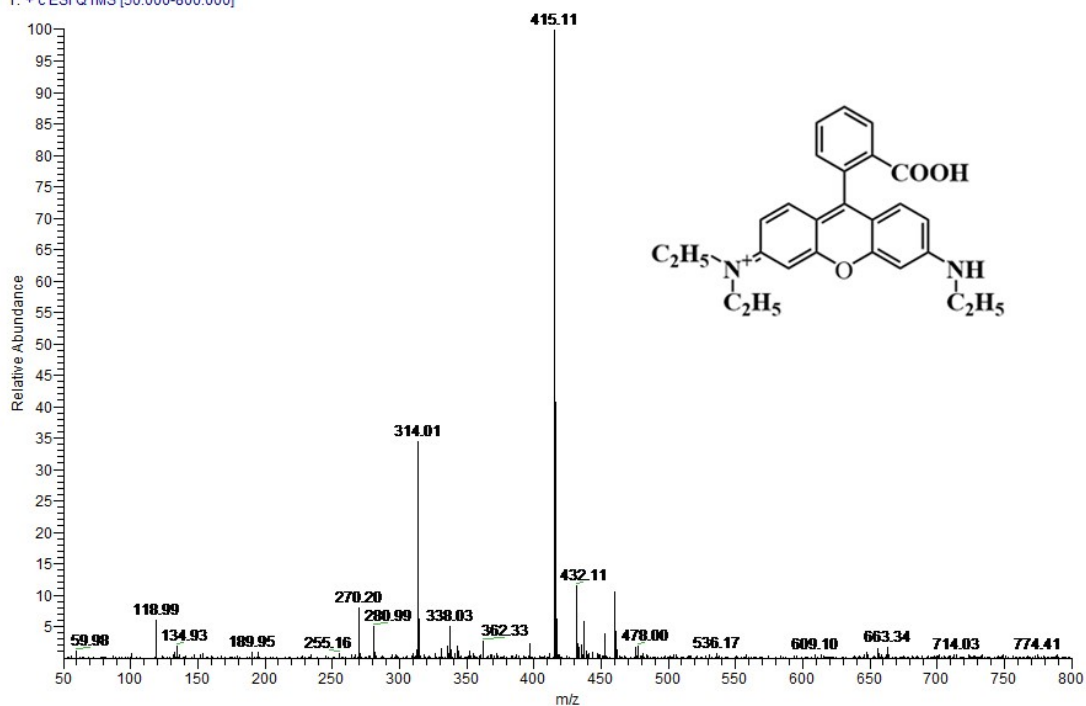

**Fig. S19** Mass spectra of 415 in RhB degradation products.

## References:

1. L. J. Bourhis, O. V. Dolomanov, R. J. Gildea, J. A. K. Howard, H. Puschmann, *Acta Cryst. A.*, 2015, **71**, 59-75.
2. O. V. Dolomanov, L. J. Bourhis, R. J. Gildea, J. A. K. Howard, H. Puschmann, J. *Appl. Crystallogr.*, 2009, **42**, 339-341.
3. G. M. Sheldrick, *Acta Cryst. C.*, 2015, **71**, 3-8.
4. A. Spek, *Acta Cryst. D.*, 2009, **65**, 148-155.
5. M. A. N. Khan, P. K. Klu, C. Wang, W. Zhang, R. Luo, M. Zhang, J. Qi, X. Sun, L. Wang, J. Li, *Chem. Eng. J.*, 2019, **363**, 234-246.
6. Q. Huang, J. Zhang, Z. He, P. Shi, X. Qin, W. Yao, *Chem. Eng. J.*, 2017, **313**, 1088-1098.
7. X. Li, A. I. Rykov, B. Zhang, Y. Zhang, J. Wang, *Catal. Sci. Technol.*, 2016, **6**, 7486-7494.
8. C.-X. Li, C.-B. Chen, J.-Y. Lu, S. Cui, J. Li, H.-Q. Liu, W.-W. Li, F. Zhang, *Chem. Eng. J.*, 2018, **337**, 101-109.
9. Y. Yu, Y. Ji, J. Lu, X. Yin, Q. Zhou, *Chem. Eng. J.*, 2021, **406**, 126759.
10. C. Wang, H. Wang, R. Luo, C. Liu, J. Li, X. Sun, J. Shen, W. Han, L. Wang, *Chem. Eng. J.*, 2017, **330**, 262-271.
11. Z. Li, M. Wang, C. Jin, J. Kang, J. Liu, H. Yang, Y. Zhang, Q. Pu, Y. Zhao, M. You, Z. Wu, *Chem. Eng. J.*, 2020, **392**, 123789.
12. R. Ramachandran, T. Sakthivel, M. Li, H. Shan, Z.-X. Xu, F. Wang, *Chemosphere*, 2021, **271**, 128509.
13. H. Li, Z. Yang, S. Lu, L. Su, C. Wang, J. Huang, J. Zhou, J. Tang, M. Huang, *Chemosphere*, 2021, **273**, 129643.
14. H. Li, J. Wan, Y. Ma, Y. Wang, X. Chen, Z. Guan, *J. Hazard. Mater.*, 2016, **318**, 154-163.
15. W. Xie, Y. Yuan, W. Jiang, S.-R. Zhang, G.-J. Xu, Y.-H. Xu, Z.-M. Su, *CrystEngComm*, 2022, **24**, 6786-6792.
